# Supplementary material
Source: PubMed Central journal article supplement (PMC6198935)

Supplemental figure 1. Participants flow diagram

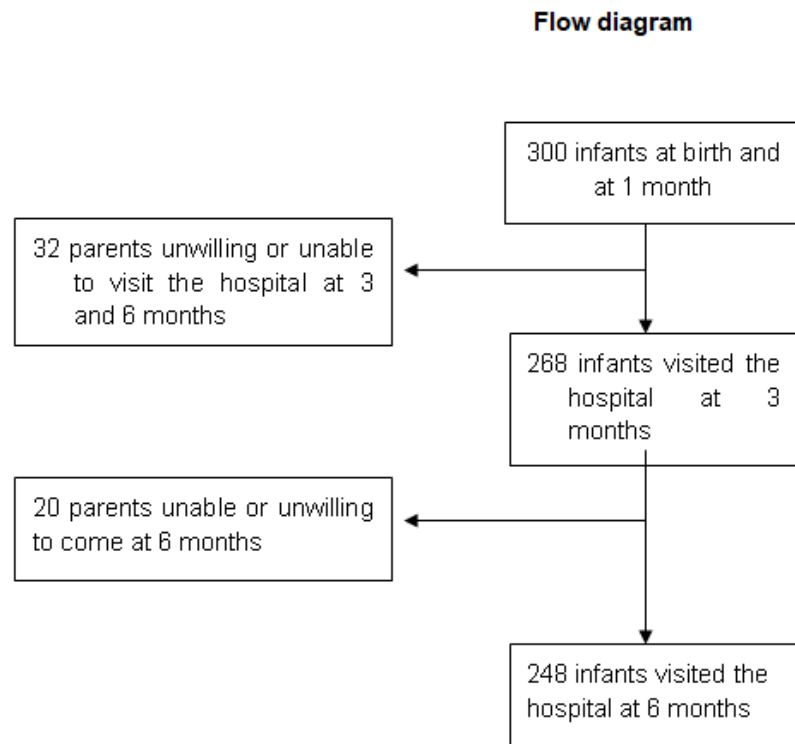

Supplement: NIHMS79894-supplement-Supplemental_figure_1.pdf [file NIHMS79894-supplement-Supplemental_figure_1.pdf]
